# Supplementary material for: Synergistic mediation of sulfur conversion in lithium–sulfur batteries by a Gerber tree-like interlayer with multiple components
Source: Royal Society of Chemistry journal article supplement (doi:10.1039/c7ta02231j), 2017-01-01
Supplement: c7ta02231j1.pdf [file c7ta02231j1.pdf]

## Supporting Information

### Synergistic mediation for sulfur conversion in lithium-sulfur batteries by Gerber tree-like interlayer with multiple components

*Chao-Ying Fan, Si-Yu Liu, Yan-Hong Shi, Han-Chi Wang, Huan-Huan Li, Hai-Feng Wang, Hai-Zhu*

*Sun,\* Xing-Long Wu,\* Jing-Ping Zhang\**

† Faculty of Chemistry, National & Local United Engineering Laboratory for Power Batteries, Northeast  
Normal University, Changchun 130024, China.

E-mail: sunhz335@nenu.edu.cn; xinglong@nenu.edu.cn; jpzhang@nenu.edu.cn

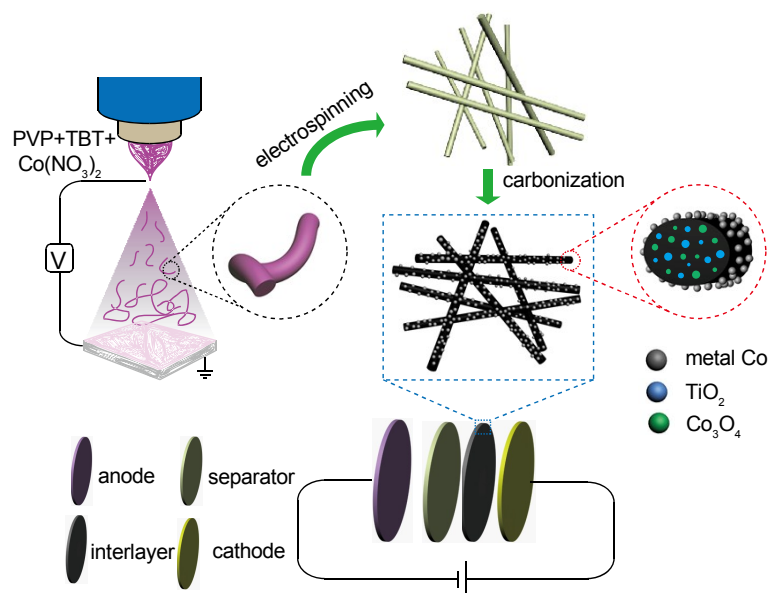

**Fig. S1** The preparation process of multifunctional interlayer and the corresponding cell configuration.

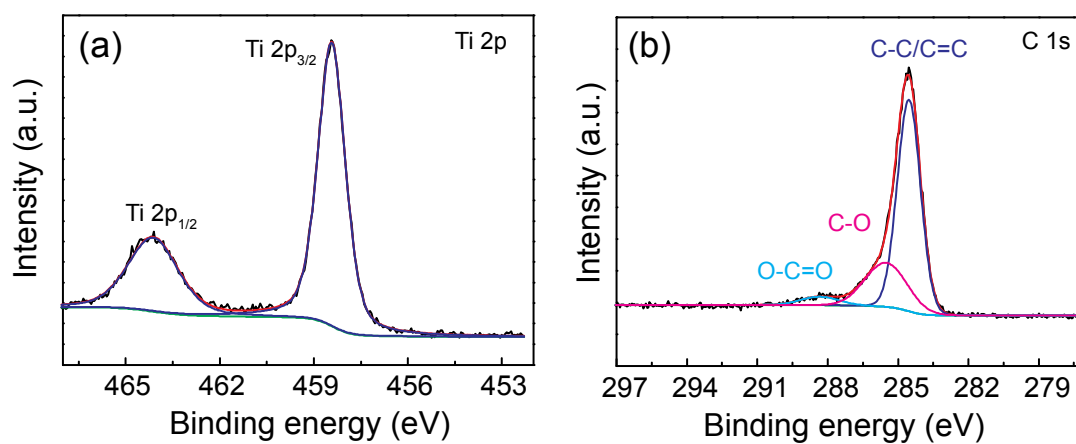

**Fig. S2** (a) Ti 2p and (b) C 1s spectrum of the interlayer before cycle.

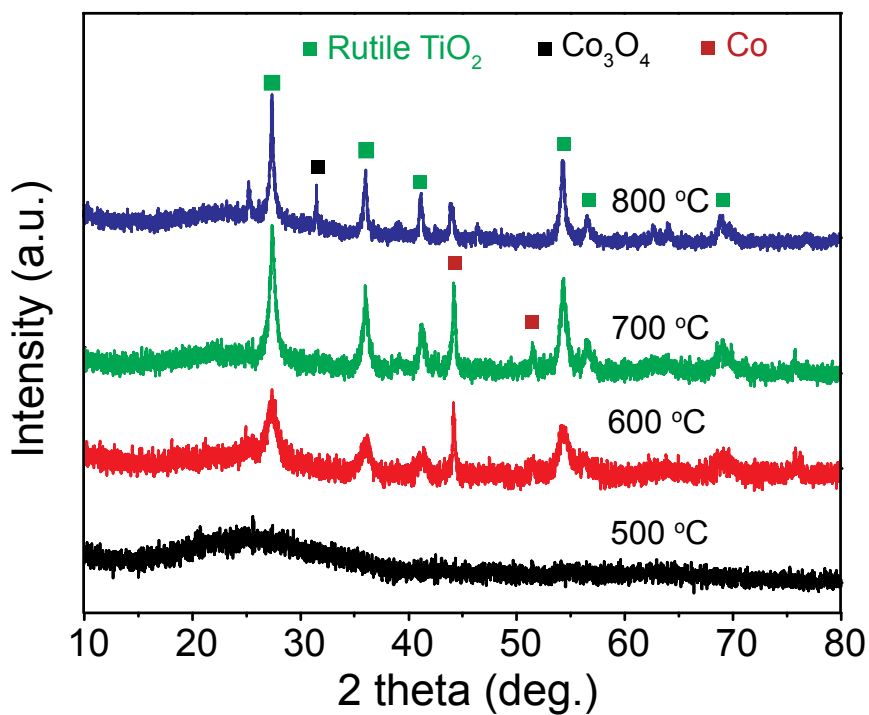

**Fig. S3** The XRD patterns of the interlayers carbonized at different temperatures.

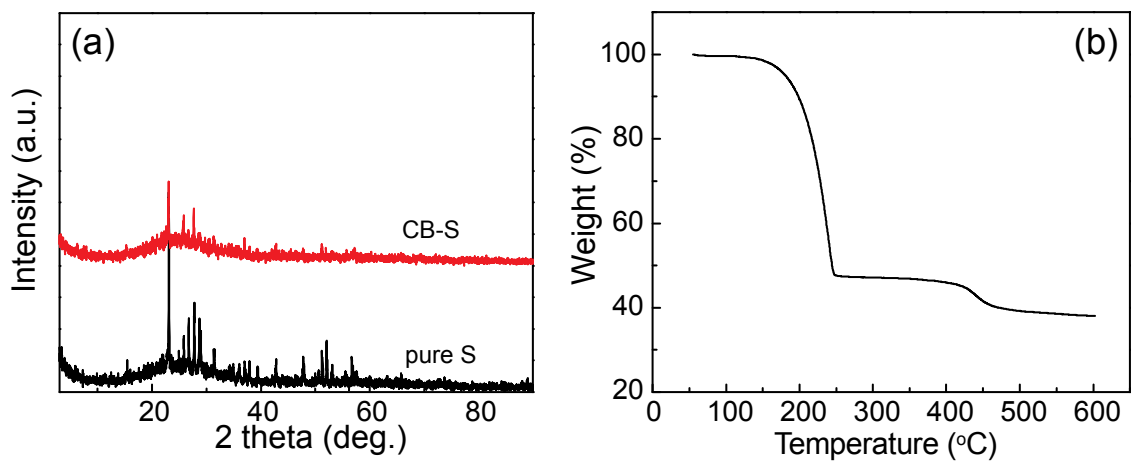

**Fig. S4** (a) XRD pattern of the CB-S cathode. (b) TGA result of the CB-S cathode.

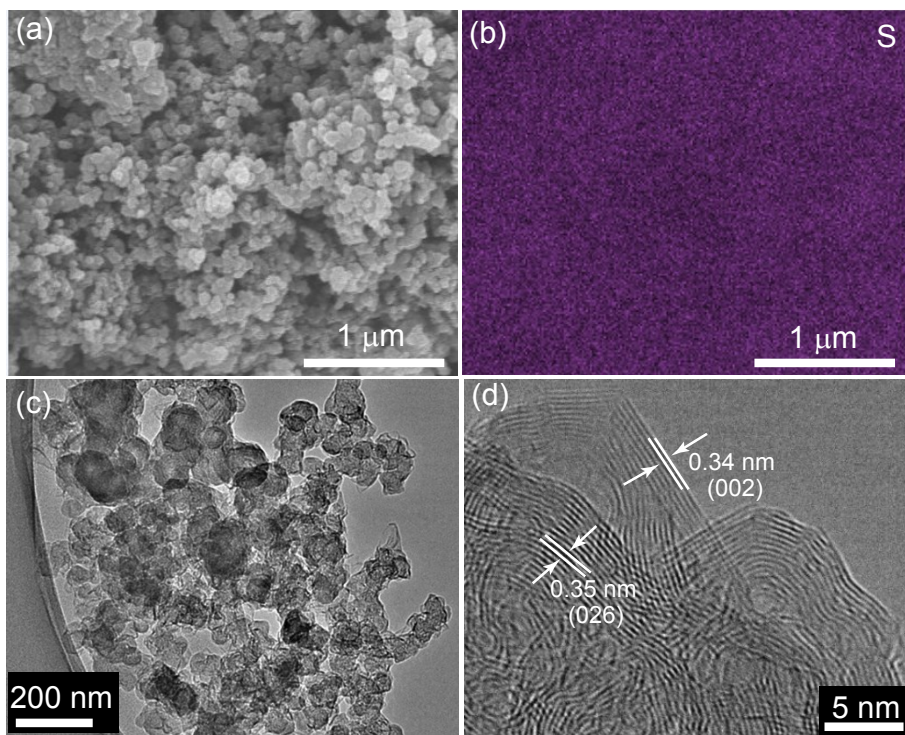

**Fig. S5** The morphology characterization of the CB-S composite. (a) SEM image (b) Elemental mapping of sulfur (c) TEM and (d) HRTEM images.

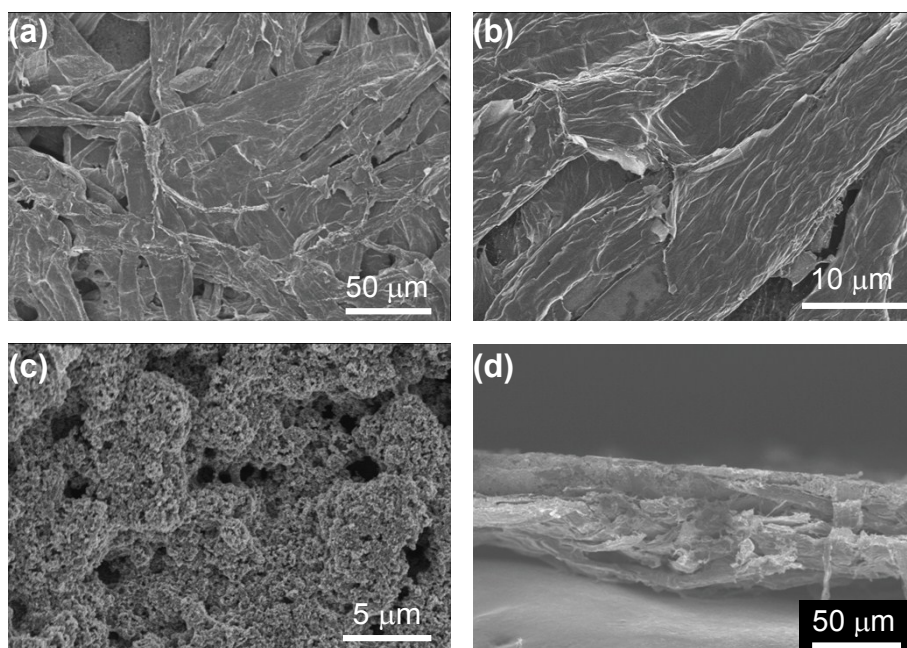

**Fig. S6** (a) Low- and (b) high-resolution SEM images of the current collector. (c) The front and (d) cross-sectional SEM image of the current collector with active materials coating (The inserted images are the photos of the cathode slice).

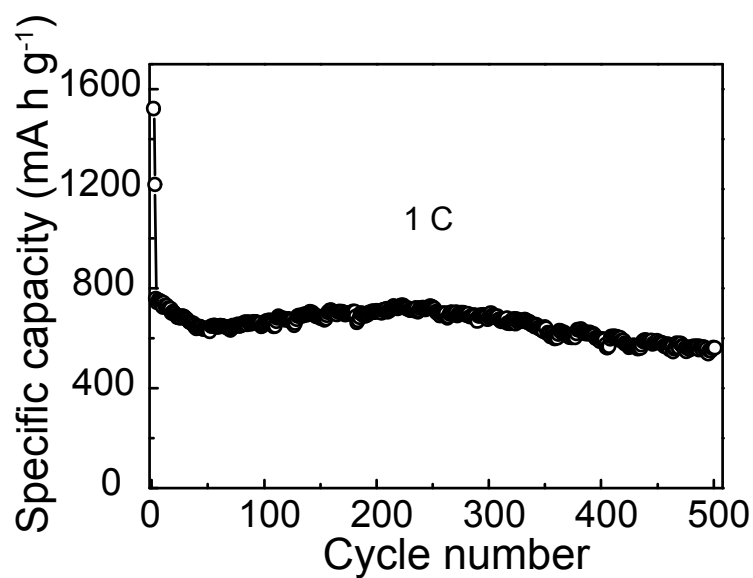

**Fig. S7** The long cycle performance of the cell with interlayer at 1 C.

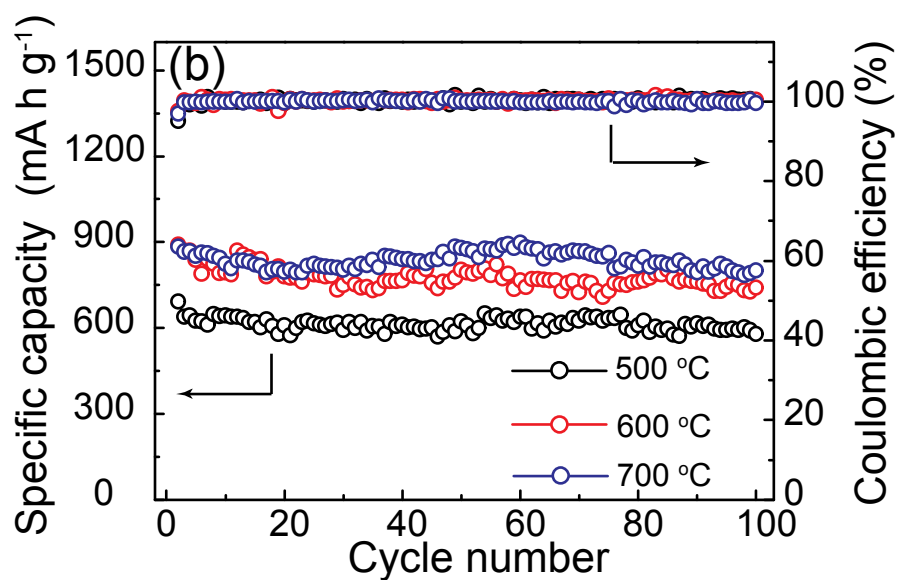

**Fig. S8.** The comparison of the cycle performances at 0.5 C for the cell with interlayers obtained at different carbonization temperatures.

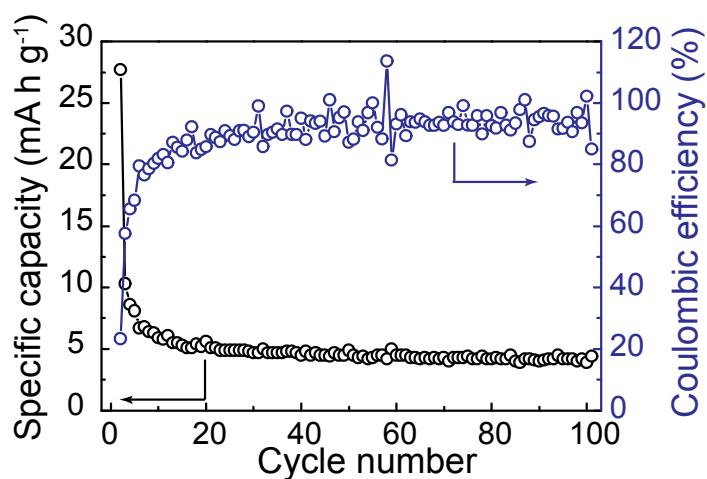

**Fig. S9** The cycle performance of the cell with individual interlayer.

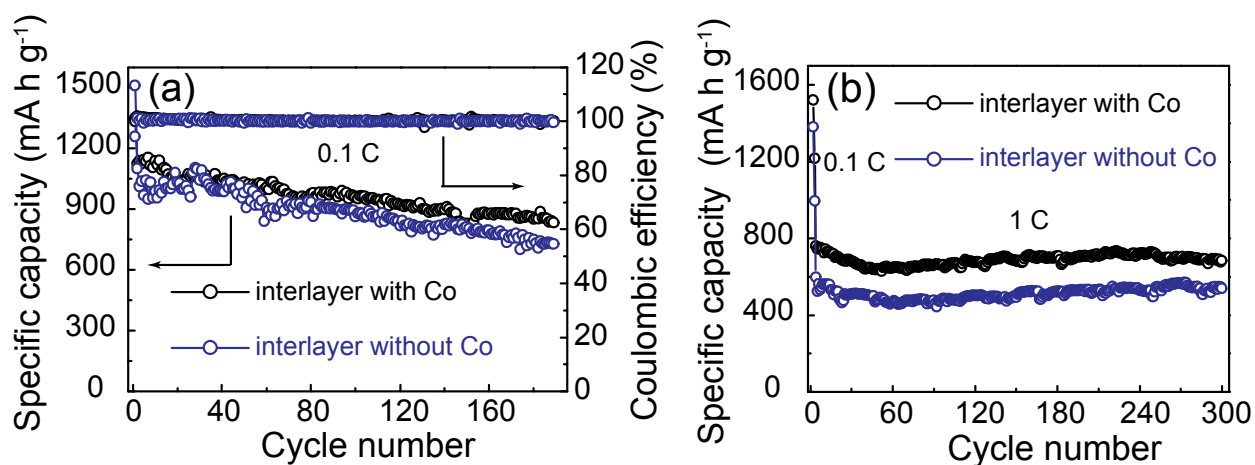

**Fig. S10** The comparison of the electrochemical performance for the cell with and without Co in the interlayer. (a) The cycle performance at 0.1 C. (b) The cycle at the high current density of 1 C.

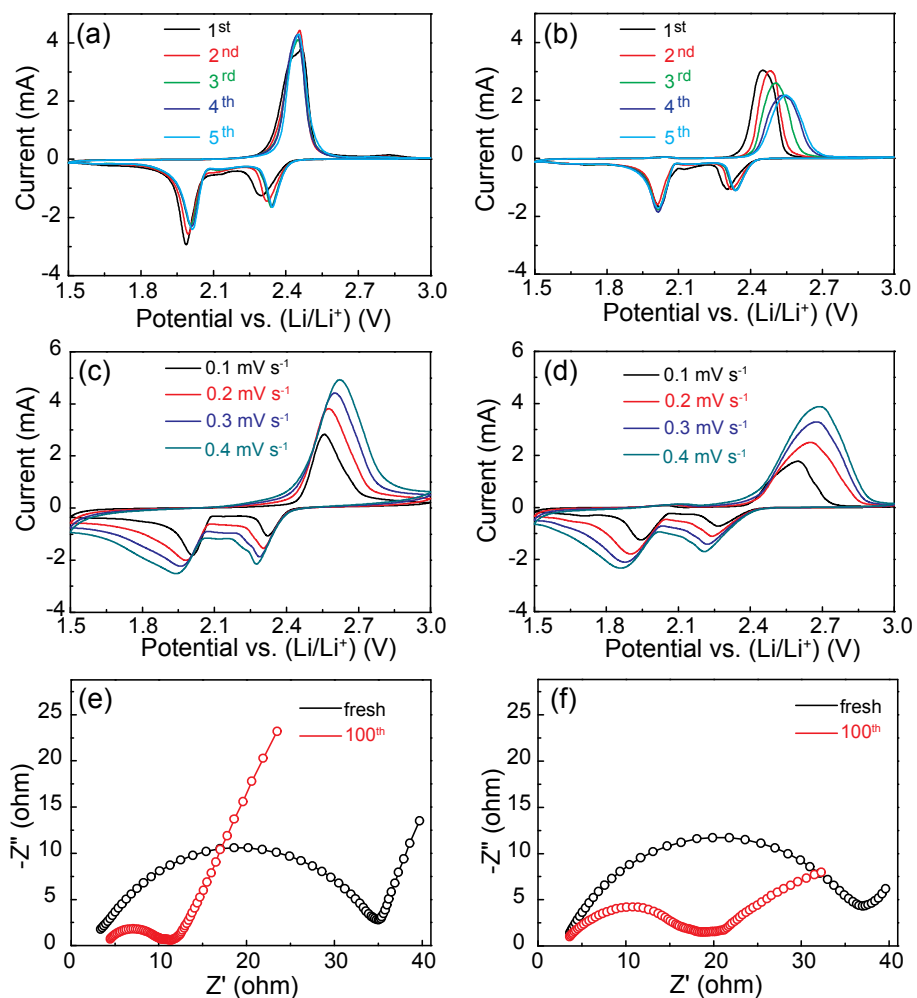

**Fig. S11** The comparison of the electrochemical characterization for the cell with (left side) and without Co (right side) in the interlayer. (a, b) CV for different cycles at  $0.1 \text{ mV s}^{-1}$  (c, d) CV curves at different scan rates (e, f) EIS results at different cycles.

**Table S1.** The comparison of electrochemical performance and relevant parameters of this work with other similar reports in the literatures about the inserted block layers between cathode and separator (containing the interlayer and the coating layer on separator or cathode).

| Composite of the Inserted block Layer                                                   | Sulfur loading on the cathode (mg cm <sup>-2</sup> ) | Sulfur content on the cathode | Mass loading of layer (mg cm <sup>-2</sup> ) | Current rate (1C=1675 mA g <sup>-1</sup> ) | Reversible capacity (mA h g <sup>-1</sup> ) | Cycle number      | Capacity retention    | Published date |
|-----------------------------------------------------------------------------------------|------------------------------------------------------|-------------------------------|----------------------------------------------|--------------------------------------------|---------------------------------------------|-------------------|-----------------------|----------------|
| Gerber tree-like interlayer with multicomponents (this work)                            | 1.5                                                  | 54%                           | 0.65                                         | 0.1C<br>0.5C<br>1C                         | 968<br>802<br>684                           | 100<br>100<br>300 | 85.3%<br>89.6%<br>90% |                |
| graphene oxide on separator <sup>1</sup>                                                | 1.0-1.5                                              | 63%                           | 0.12                                         | 0.1C                                       | 708                                         | 100               | 77%                   | 2015           |
| freestanding bilayer C-S cathode <sup>2</sup>                                           | 3                                                    | 40%                           | 0.92                                         | 1C                                         | 750                                         | 300               | 83.4%                 | 2016           |
| Carbonized non-woven fabric film as interlayer <sup>3</sup>                             | 2                                                    | 70%                           | -                                            | 0.1C                                       | 858                                         | 100               | 57.7%                 | 2015           |
| Active carbon nanofiber-filter coated separator <sup>4</sup>                            | 2.1-2.3                                              | 70%                           | 0.35                                         | 0.2C                                       | 819                                         | 100               | 74%                   | 2015           |
| N-doped porous hollow carbon sphere coated separator <sup>5</sup>                       | 1.6                                                  | 60%                           | 0.28                                         | 1C                                         | 542                                         | 500               | 44.5%                 | 2015           |
| S-doped microporous carbon as interlayer <sup>6</sup>                                   | 1.5                                                  | 60%                           | 3.7-4.3                                      | 0.2C                                       | 976                                         | 200               | 63.2%                 | 2016           |
| B-doped redox graphene oxides coated separator <sup>7</sup>                             | 1.45-1.56                                            | 56%                           | 0.2-0.3                                      | 0.1C                                       | 663.6                                       | 300               | 54%                   | 2016           |
| graphene embedded carbon fiber as interlayer <sup>8</sup>                               | 1.2                                                  | 60%                           | -                                            | 1C                                         | 698                                         | 300               | 61.3%                 | 2015           |
| PANIF-MCNT coated separator <sup>9</sup>                                                | 1.4                                                  | 60%                           | 0.01                                         | 0.2C                                       | 709                                         | 100               | 70%                   | 2015           |
| COF-net on CNF-net interlayer <sup>10</sup>                                             | 1.1                                                  | 75%                           | 2.08                                         | 2C                                         | 630                                         | 300               | 84%                   | 2016           |
| Nafion nanoweb coated on sulfur electrode <sup>11</sup>                                 | 2.4                                                  | 60%                           | 0.84                                         | 0.5C                                       | 695                                         | 200               | 65.8%                 | 2016           |
| V <sub>2</sub> O <sub>5</sub> decorated CNF as interlayer <sup>12</sup>                 | 2                                                    | 70%                           | 1                                            | 0.3C                                       | 889                                         | 100               | 87%                   | 2017           |
| SiO <sub>2</sub> nanoparticle decorated separator <sup>13</sup>                         | 1.2-1.4                                              | 48%                           | -                                            | 0.2C                                       | 603.5                                       | 200               | 64%                   | 2017           |
| RuO <sub>2</sub> nanoparticle-embedded mesoporous carbon coated separator <sup>14</sup> | 2                                                    | 70%                           | 0.3                                          | 0.5C                                       | 665                                         | 300               | -                     | 2016           |
| PAN-SiO <sub>2</sub> nanofiber membrane with MCNT <sup>15</sup>                         | 1-1.2                                                | 70%                           | 3.44                                         | 0.2C                                       | 741                                         | 100               | 62.7%                 | 2016           |
| trilayer graphene-separator-Al <sub>2</sub> O <sub>3</sub> <sup>16</sup>                | 0.75                                                 | 60%                           | 1.23                                         | 0.2C                                       | 804.4                                       | 100               | 75%                   | 2016           |
| Few layered- Ti <sub>3</sub> C <sub>2</sub> coated separator <sup>17</sup>              | 1.9                                                  | 70%                           | 0.2-0.32                                     | 0.3C                                       | 721                                         | 100               | 88%                   | 2016           |



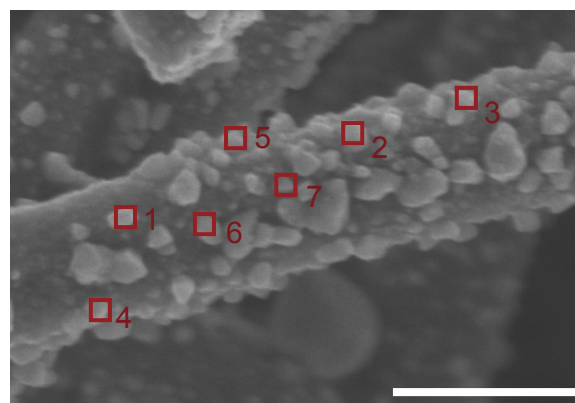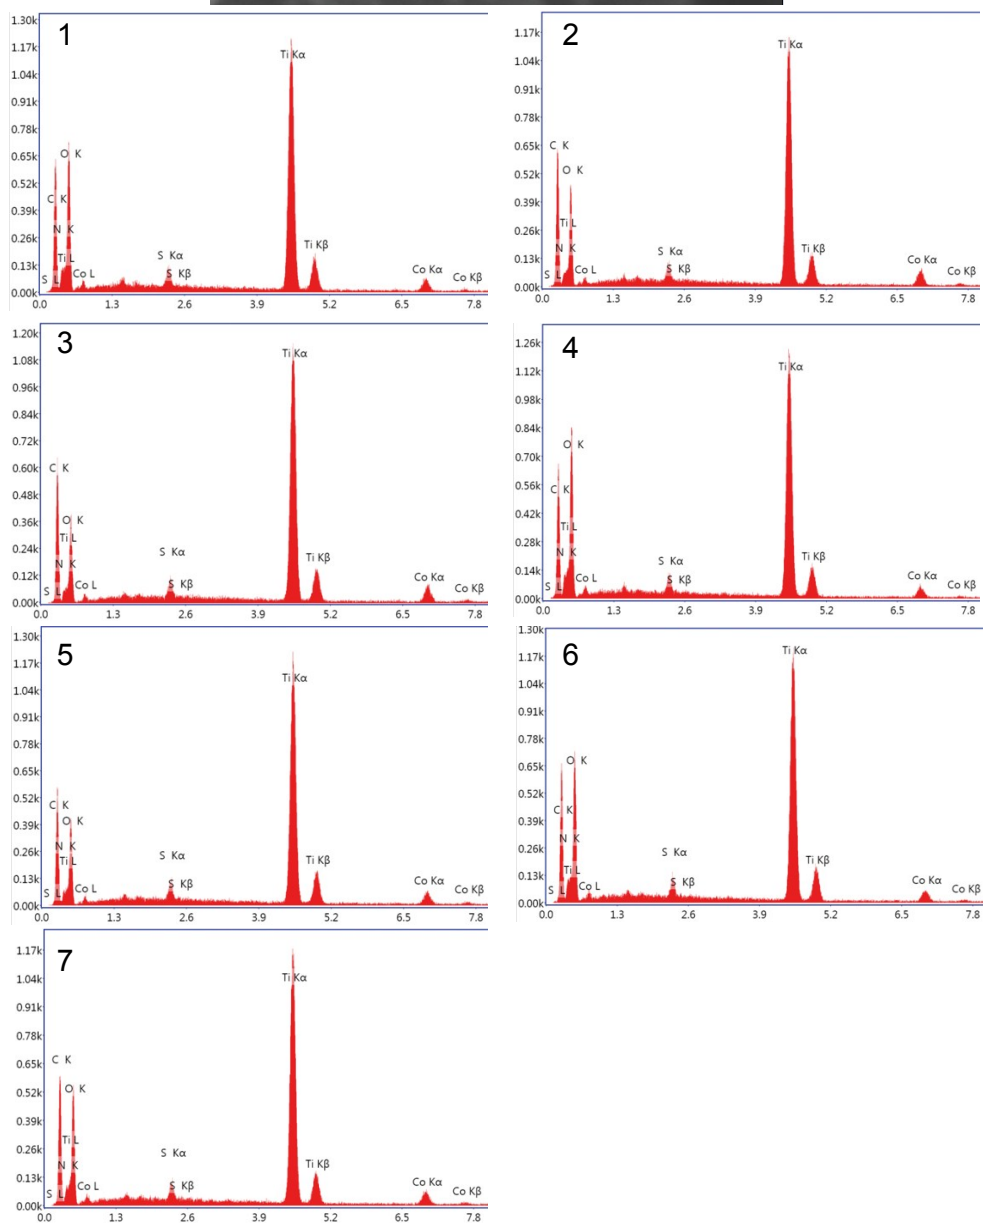

**Fig. S12** EDX spectra analysis aimed at seven nanoparticles on the nanofibers, respectively.

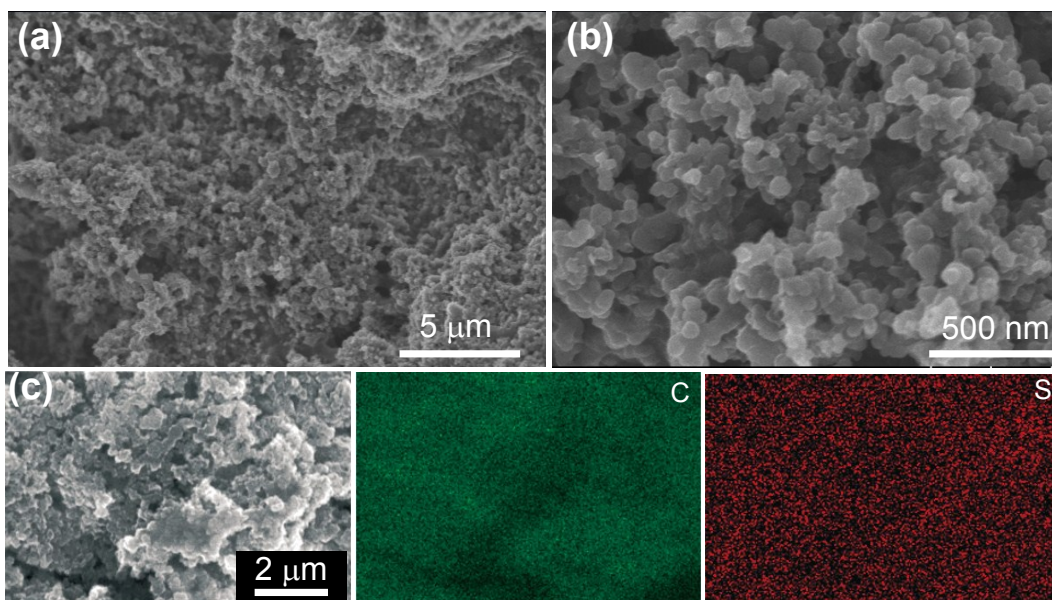

**Fig. S13** The morphology characterization of the cathode after 100 cycles. (a) Low- and (b) high-resolution SEM images of the cathode. EDX mapping of element C and S corresponding to Figure (c).

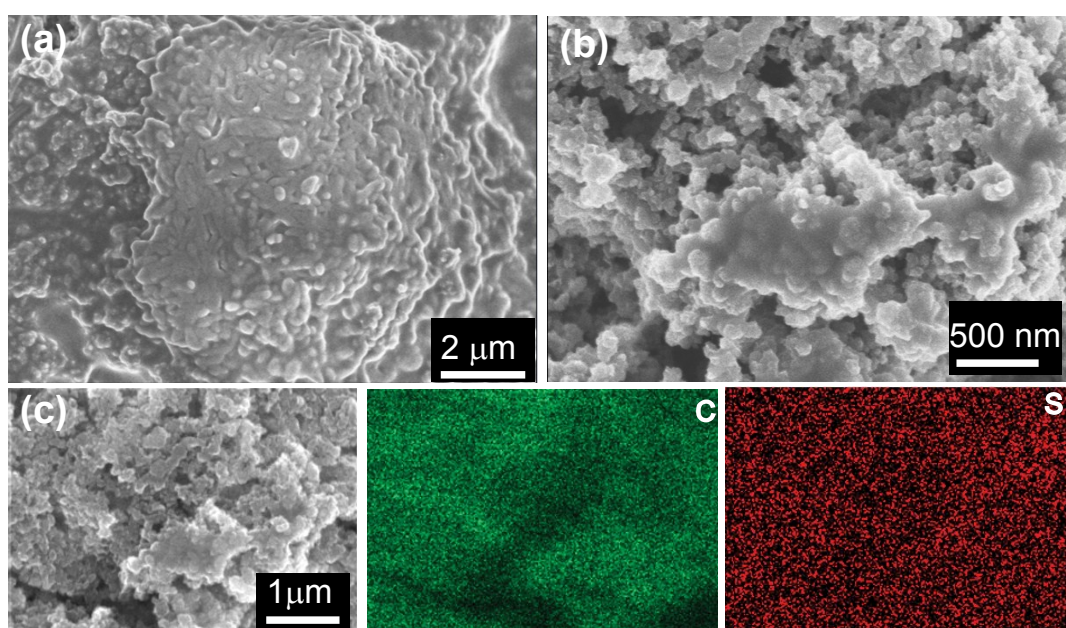

**Fig. S14** The morphology characterization of the cathode for cell without interlayer after cycles. (a) Low- and (b) high-resolution SEM images of the cathode. EDX mapping of the cathode corresponding to Figure (c).

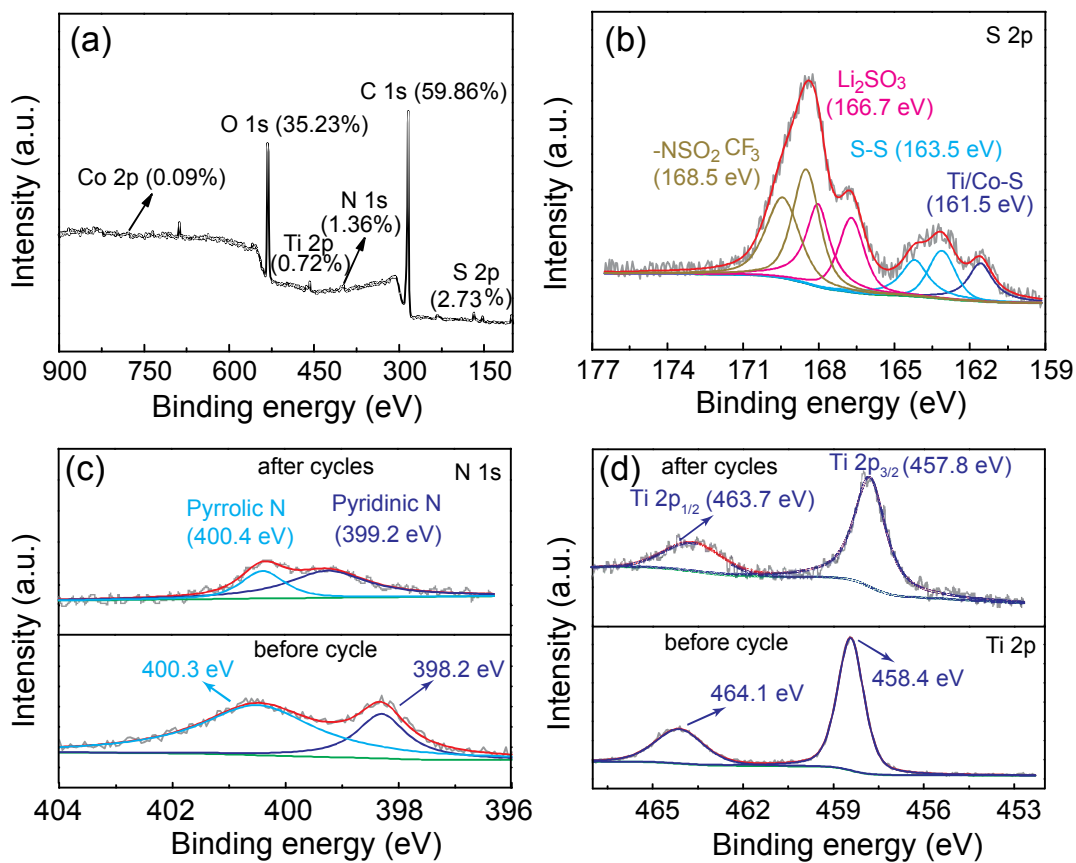

**Fig. S15** XPS characterization of the interlayer after cycles compared with that before cycle. (a) Survey spectrum (b) S 2p spectrum (c) N 1s spectrum (d) Ti 2p spectrum.

**Table S2.** EDS results (at%) of the nanoparticles marked by red boxes on the fibers in Figure S5 after 100 cycles.

|   | C     | N    | O     | S    | Ti   | Co   |
|---|-------|------|-------|------|------|------|
| 1 | 38.1% | 5.5% | 47.4% | 0.4% | 7.8% | 0.7% |
| 2 | 46.1% | 3.3% | 40.1% | 0.4% | 8.9% | 1.1% |
| 3 | 47.5% | 2.4% | 38.7% | 0.5% | 9.7% | 0.7% |
| 4 | 35.4% | 6.6% | 49.7% | 0.4% | 7.2% | 0.6% |
| 5 | 43.3% | 4.1% | 41.0% | 0.6% | 9.9% | 1.1% |
| 6 | 37.8% | 5.9% | 47.5% | 0.4% | 7.6% | 0.7% |
| 7 | 41.2% | 5.0% | 43.9% | 0.4% | 8.5% | 0.9% |

## Reference

- 1 J.-Q. Huang, T.-Z. Zhuang, Q. Zhang, H.-J. Peng, C.-M. Chen, F. Wei, *ACS Nano*, 2015, **9**, 3002.
- 2 H.-S. Kang, Y.-K. Sun, *Adv. Funct. Mater.*, 2016, **26**, 1225.
- 3 Z. Cao, C. Ma, Y. Yin, J. Zhang, Y. Ding, M. Shi, S. Yang, *New J. Chem.*, 2015, **39**, 9659.
- 4 S.-H. Chung, P. Han, R. Singhal, V. Kalra, A. Manthiram, *Adv. Energy Mater.*, 2015, **5**, 1500738.
- 5 Z. Zhang, G. Wang, Y. Lai, J. Li, Z. Zhang, W. Chen, *J. Power Sources*, 2015, **300**, 157.
- 6 J. Yang, F. Chen, C. Li, T. Bai, B. Long, X. Zhou, *J. Mater. Chem. A*, 2016, **4**, 14324.
- 7 F. Wu, J. Qian, R. Chen, Z. Sun, Y. Xing, L. Li, *J. Mater. Chem. A*, 2016, **4**, 17033.
- 8 L. Chai, J. Wang, H. Wang, L. Zhang, W. Yu, L. Mai, *Nano Energy*, 2015, **17**, 224.
- 9 C.-H. Chang, S.-H. Chung, A. Manthiram, *J. Mater. Chem. A*, 2015, **3**, 18829.
- 10 J. Yoo, S. J. Cho, G. Y. Jung, S. H. Kim, K. H. Choi, J. H. Kim, C. K. Lee, S. K. Kwak, S. Y. Lee, *Nano Lett.*, 2016, **16**, 3292.

- 11 J.-H. Kim, J. Choi, J. Seo, J. Kwon, U. Paik, *J. Mater. Chem. A*, 2016, **4**, 11203.
- 12 M. Liu, Q. Li, X. Qin, G. Liang, W. Han, D. Zhou, Y. B. He, B. Li, F. Kang, *Small*, 2017, 1602539.
- 13 J. Li, Y. Huang, S. Zhang, W. Jia, X. Wang, Y. Guo, D. Jia, L. Wang, *ACS Appl. Mater. Interfaces*, 2017, **9**, 7499.
- 14 J. Balach, T. Jaumann, S. Muhlenhoff, J. Eckert, L. Giebeler, *Chem. Commun.*, 2016, **52**, 8134.
- 15 J. Zhu, E. Yildirim, K. Aly, J. Shen, C. Chen, Y. Lu, M. Jiang, D. Kim, A. E. Tonelli, M. A. Pasquinelli, P. D. Bradford, X. Zhang, *J. Mater. Chem. A*, 2016, **4**, 13572.
- 16 R. Song, R. Fang, L. Wen, Y. Shi, S. Wang, F. Li, *J. Power Sources*, 2016, **301**, 179.
- 17 C. Lin, W. Zhang, L. Wang, Z. Wang, W. Zhao, W. Duan, Z. Zhao, B. Liu, J. Jin, *J. Mater. Chem. A*, 2016, **4**, 5993.
